# Supplementary material for: Sterile Cerebrospinal Fluid Culture at Cryptococcal Meningitis Diagnosis Is Associated with High Mortality
Source: MDPI journal article supplement (doi:10.3390/jof9010046), 2022-12-28
Supplement: s1 [file s1]

**Supplemental Table 1: Baseline Mean CSF Biomarkers by CSF Quantitative Culture Tertile**

| Biomarkers<br>log <sub>2</sub> pg/mL                    | CSF Culture Sterile |                   | CSF CFU 1-14,700 |                   | CSF CFU 14,701-206,000 |                   | CSF CFU >206,000 |                   | P-value |
|---------------------------------------------------------|---------------------|-------------------|------------------|-------------------|------------------------|-------------------|------------------|-------------------|---------|
|                                                         | N                   | Mean (95% CI)     | N                | Mean (95% CI)     | N                      | Mean (95% CI)     | N                | Mean (95% CI)     |         |
| Mediate inflammatory responses                          |                     |                   |                  |                   |                        |                   |                  |                   |         |
| IL-1α                                                   | 24                  | 2.0 (1.1, 2.8)    | 98               | 1.0 (0.5, 1.5)    | 99                     | 1.3 (0.9, 1.7)    | 113              | 1.3 (1.0, 1.7)    | 0.23    |
| IL-6                                                    | 24                  | 9.2 (7.8, 10.6)   | 98               | 8.3 (7.6, 8.9)    | 99                     | 7.4 (6.7, 8.1)    | 113              | 7.4 (6.9, 8.0)    | 0.02    |
| IL-1β                                                   | 24                  | 1.9 (1.0, 2.8)    | 98               | 0.7 (0.2, 1.2)    | 99                     | 0.9 (0.6, 1.3)    | 113              | 1.0 (0.6, 1.3)    | 0.09    |
| PDGF-aa                                                 | 24                  | 6.9 (6.4, 7.4)    | 98               | 6.2 (5.9, 6.5)    | 99                     | 6.2 (6.0, 6.4)    | 113              | 6.3 (6.1, 6.6)    | 0.08    |
| PDGF-ab                                                 | 24                  | 1.0 (-0.3, 2.3)   | 98               | -0.2 (-0.8, 0.4)  | 99                     | -0.1 (-0.8, 0.6)  | 113              | -0.2 (-0.9, 0.4)  | 0.39    |
| VEGF                                                    | 24                  | 6.1 (5.7, 6.6)    | 98               | 5.5 (5.2, 5.8)    | 99                     | 5.3 (5.0, 5.5)    | 113              | 5.5 (5.3, 5.8)    | 0.05    |
| FGF-basic                                               | 24                  | 0.2 (-0.8, 1.2)   | 98               | 0.0 (-0.4, 0.4)   | 99                     | 0.2 (-0.2, 0.6)   | 113              | -0.3 (-0.7, 0.1)  | 0.31    |
| T-helper cell Type 1 (Th <sub>1</sub> ) immune response |                     |                   |                  |                   |                        |                   |                  |                   |         |
| IL-12                                                   | 24                  | 2.6 (1.8, 3.4)    | 98               | 1.6 (1.1, 2.1)    | 99                     | 1.9 (1.6, 2.3)    | 113              | 2.1 (1.8, 2.4)    | 0.12    |
| IL-15                                                   | 24                  | 1.5 (1.1, 2.0)    | 98               | 1.1 (0.7, 1.6)    | 99                     | 1.5 (1.2, 1.8)    | 113              | 1.7 (1.4, 1.9)    | 0.13    |
| IFN-γ                                                   | 24                  | 3.0 (2.0, 3.9)    | 98               | 1.7 (1.2, 2.2)    | 99                     | 1.4 (0.9, 1.8)    | 113              | 1.3 (0.9, 1.7)    | 0.02    |
| TNF-α                                                   | 24                  | 5.6 (4.7, 6.5)    | 98               | 5.0 (4.5, 5.5)    | 99                     | 5.1 (4.7, 5.6)    | 113              | 5.2 (4.9, 5.6)    | 0.70    |
| GM-CSF                                                  | 24                  | 6.2 (5.4, 7.0)    | 98               | 5.2 (4.9, 5.5)    | 99                     | 4.9 (4.6, 5.2)    | 113              | 5.0 (4.7, 5.2)    | <0.001  |
| GranzymeB                                               | 24                  | 4.5 (3.3, 5.7)    | 98               | 3.5 (2.9, 4.1)    | 99                     | 3.4 (2.9, 3.9)    | 113              | 3.4 (2.9, 3.8)    | 0.30    |
| TRAIL                                                   | 24                  | 3.2 (2.4, 4.0)    | 98               | 2.0 (1.5, 2.5)    | 99                     | 2.1 (1.6, 2.6)    | 113              | 2.2 (1.9, 2.6)    | 0.14    |
| CCL2 (MCP1)                                             | 24                  | 9.6 (9.2, 10.1)   | 98               | 9.6 (9.4, 9.9)    | 99                     | 9.8 (9.5, 10.1)   | 113              | 10.2 (9.9, 10.4)  | 0.03    |
| CCL3 (MIP1α)                                            | 24                  | 5.1 (4.4, 5.8)    | 98               | 4.6 (4.2, 5.0)    | 99                     | 5.2 (4.9, 5.5)    | 113              | 5.4 (5.2, 5.6)    | <0.01   |
| CCL4 (MIP1β)                                            | 24                  | 7.5 (6.9, 8.2)    | 98               | 7.1 (6.8, 7.4)    | 99                     | 7.3 (7.1, 7.5)    | 113              | 7.3 (7.1, 7.5)    | 0.53    |
| CCL5 (RANTES)                                           | 17                  | 5.8 (4.5, 7.1)    | 66               | 4.7 (4.0, 5.3)    | 65                     | 4.8 (4.2, 5.5)    | 78               | 4.5 (3.9, 5.1)    | 0.35    |
| CXCL10 (IP10)                                           | 24                  | 10.9 (10.2, 11.5) | 98               | 10.9 (10.6, 11.2) | 99                     | 10.6 (10.3, 10.9) | 113              | 10.3 (9.9, 10.7)  | 0.09    |
| T-helper cell Type 2 (Th <sub>2</sub> ) immune response |                     |                   |                  |                   |                        |                   |                  |                   |         |
| IL-4                                                    | 24                  | -0.3 (-1.0, 0.4)  | 98               | -1.1 (-1.7, -0.4) | 99                     | -0.1 (-0.6, 0.3)  | 113              | -0.2 (-0.7, 0.3)  | 0.08    |
| IL-5                                                    | 24                  | 0.8 (-0.3, 1.9)   | 98               | -0.2 (-0.8, 0.3)  | 99                     | -0.5 (-1.0, 0.0)  | 113              | -0.7 (-1.1, -0.3) | 0.07    |
| IL-13                                                   | 24                  | 4.4 (3.7, 5.0)    | 98               | 3.8 (3.5, 4.2)    | 99                     | 4.0 (3.6, 4.3)    | 113              | 4.0 (3.7, 4.3)    | 0.51    |
| IL-33                                                   | 24                  | 1.9 (0.3, 3.5)    | 98               | 1.4 (0.7, 2.1)    | 99                     | 1.3 (0.5, 2.1)    | 113              | 1.2 (0.5, 2.0)    | 0.89    |
| IL-25                                                   | 24                  | 3.3 (2.5, 4.0)    | 98               | 2.7 (2.1, 3.3)    | 99                     | 3.1 (2.6, 3.7)    | 113              | 3.4 (2.9, 3.8)    | 0.31    |
| Eotaxin                                                 | 24                  | 3.7 (3.0, 4.4)    | 98               | 3.1 (2.8, 3.5)    | 99                     | 3.2 (2.9, 3.6)    | 113              | 3.3 (3.0, 3.6)    | 0.52    |
| Type 3 (Th <sub>17</sub> ) immune response              |                     |                   |                  |                   |                        |                   |                  |                   |         |
| IL-17                                                   | 24                  | 2.0 (0.8, 3.1)    | 98               | 0.6 (0.0, 1.2)    | 99                     | -0.2 (-0.7, 0.4)  | 113              | -0.3 (-0.8, 0.2)  | <0.01   |
| G-CSF                                                   | 24                  | 7.0 (5.9, 8.1)    | 98               | 5.1 (4.6, 5.6)    | 99                     | 4.7 (4.3, 5.0)    | 113              | 5.0 (4.6, 5.3)    | <0.001  |
| CXCL1 (GROA)                                            | 24                  | 8.3 (7.3, 9.3)    | 98               | 7.1 (6.5, 7.7)    | 99                     | 7.1 (6.6, 7.6)    | 113              | 7.1 (6.7, 7.5)    | 0.22    |
| CXCL2 (GROB)                                            | 24                  | 4.8 (3.9, 5.6)    | 98               | 3.5 (3.0, 3.9)    | 99                     | 3.3 (2.8, 3.7)    | 113              | 3.7 (3.3, 4.0)    | 0.02    |
| IL-8 (CXCL8)                                            | 24                  | 9.4 (8.5, 10.4)   | 98               | 8.7 (8.2, 9.2)    | 99                     | 8.6 (8.2, 9.1)    | 113              | 8.7 (8.3, 9.1)    | 0.51    |
| CCL20 (MIP3α)                                           | 24                  | 2.7 (2.0, 3.4)    | 98               | 1.8 (1.4, 2.2)    | 99                     | 1.8 (1.5, 2.2)    | 113              | 1.8 (1.5, 2.2)    | 0.17    |

| Modulate/dampen Immune Responses |    |                   |    |                   |    |                   |     |                   |       |
|----------------------------------|----|-------------------|----|-------------------|----|-------------------|-----|-------------------|-------|
| IL-1ra                           | 24 | 11.2 (10.2, 12.3) | 98 | 11.5 (11.1, 11.9) | 99 | 11.7 (11.3, 12.0) | 113 | 12.0 (11.7, 12.3) | 0.14  |
| IL-10                            | 24 | 7.9 (7.1, 8.6)    | 98 | 7.8 (7.6, 8.1)    | 99 | 7.7 (7.5, 7.9)    | 113 | 7.6 (7.4, 7.9)    | 0.69  |
| IL-2                             | 24 | 2.6 (2.0, 3.2)    | 98 | 1.9 (1.4, 2.3)    | 99 | 2.1 (1.8, 2.4)    | 113 | 2.0 (1.7, 2.3)    | 0.29  |
| TGF- $\alpha$                    | 24 | 3.0 (2.2, 3.8)    | 98 | 2.5 (2.1, 3.0)    | 99 | 2.8 (2.5, 3.1)    | 113 | 3.0 (2.6, 3.3)    | 0.42  |
| EGF                              | 24 | 0.4 (-0.8, 1.6)   | 98 | 0.2 (-0.3, 0.7)   | 99 | 0.3 (-0.2, 0.8)   | 113 | 0.4 (-0.1, 1.0)   | 0.92  |
| Immune Exhaustion                |    |                   |    |                   |    |                   |     |                   |       |
| PD-L1                            | 24 | 7.1 (6.5, 7.7)    | 98 | 6.4 (6.0, 6.8)    | 99 | 6.4 (6.1, 6.7)    | 113 | 6.5 (6.2, 6.8)    | 0.34  |
| Other                            |    |                   |    |                   |    |                   |     |                   |       |
| CCL19 (MIP3 $\beta$ )            | 24 | 7.4 (6.4, 8.4)    | 98 | 6.7 (6.3, 7.1)    | 99 | 6.3 (5.9, 6.6)    | 113 | 6.0 (5.7, 6.3)    | <0.01 |
| TNFSF5 (CD40L)                   | 24 | 8.5 (7.6, 9.4)    | 98 | 7.8 (7.3, 8.3)    | 99 | 7.8 (7.4, 8.3)    | 113 | 7.9 (7.6, 8.3)    | 0.53  |
| Fractalkine (CS3CL1)             | 24 | 8.7 (8.3, 9.0)    | 98 | 8.0 (7.6, 8.3)    | 99 | 7.9 (7.6, 8.2)    | 113 | 8.1 (7.9, 8.4)    | 0.20  |
| Flt3Ligand                       | 24 | 7.1 (6.8, 7.5)    | 98 | 6.5 (6.2, 6.7)    | 99 | 6.5 (6.3, 6.7)    | 113 | 6.5 (6.3, 6.7)    | 0.05  |
| IFN- $\alpha$                    | 24 | 3.1 (2.2, 3.9)    | 98 | 1.6 (1.0, 2.2)    | 99 | 1.7 (1.3, 2.1)    | 113 | 2.1 (1.7, 2.4)    | 0.02  |
| IFN- $\beta$                     | 24 | -1.0 (-2.1, 0.1)  | 98 | -1.3 (-1.9, -0.8) | 98 | -1.0 (-1.5, -0.6) | 113 | -1.1 (-1.6, -0.6) | 0.83  |
| IL-3                             | 24 | 0.9 (-0.3, 2.2)   | 98 | 1.1 (0.6, 1.7)    | 99 | 1.3 (0.7, 2.0)    | 113 | 1.4 (0.8, 2.0)    | 0.87  |
| IL7                              | 24 | 0.9 (0.1, 1.7)    | 98 | 0.6 (0.2, 1.0)    | 99 | 0.7 (0.3, 1.1)    | 113 | 0.8 (0.5, 1.1)    | 0.78  |

Values presented as log2 pg/mL. P-value from unadjusted linear regression.
